# Supplementary material
Source: PubMed Central journal article supplement (PMC6868877)
Supplement: ao9b02435_si_001.pdf [file ao9b02435_si_001.pdf]

## Supporting Information

### Multifunctional mineral hydrogels: potential in artificially intelligent skin and drug delivery†

Jufen Yan,<sup>‡</sup> Jianhua Zhu,<sup>\*,‡</sup>  Mingfang Cui,<sup>‡</sup> Jing Zhang,<sup>‡</sup> Fang Ma,<sup>‡</sup> Yiping Su<sup>§</sup> and Xinya Han<sup>\*,‡</sup>

<sup>†</sup>Department of Chemistry and Chemical Engineering and <sup>‡</sup>Key Laboratory of Metallurgical Emission Reduction & Resources Recycling (Ministry of Education), Anhui University of Technology, Maanshan, 243002, China.

<sup>§</sup>School of Environmental Science and Engineering, Guangdong Provincial Key Laboratory of Soil and Groundwater Pollution Control, Southern University of Science and Technology, Shenzhen 518055, Guangdong, China

### Corresponding Authors

\* E-mail: thesea@ustc.edu.cn. Tel: 86+555+2311879 (J.Z.).

\* E-mail: xinyah@126.com (X.H.).

## **Table of Contents**

**Figure S1.** The photos of ACP/PAA/CS hydrogels

**Figure S2.** The ACP/PAA/CS hydrogel with various shapes

**Figure S3.** The self-healing performance of ACP/PAA/CS hydrogel

**Figure S4.** The swelling kinetic of the dried hydrogel sample in different solution at 25°C

**Figure S5.** XRD profile of the dried ACP/PAA/CS hydrogel

**Figure S6.** Frequency dependence of storage ( $G'$ ) and loss ( $G''$ ) moduli of ACP/PAA/CS hydrogel compared with ACP/PAA/hydrogel

**Figure S7.** Microscopy images of NHDF cell after 24 h incubation with different hydrogel extracts

**Figure S8.** The swelling behavior of the hydrogels with different amount of CS at various pH values

**Figure S9.** Photos of different hydrogels immersed in solution with pH=7.4

**Figure S10.** The standard curve of kanamycin sulfate

**Figure S11.** The dielectric layer of capacitive-pressure sensor

## **Materials**

Polyacrylic acid (PAA) with molecular weight of  $100,000 \text{ g}\cdot\text{mol}^{-1}$  and chitosan (CS) with low molecular weight were supplied by Sigma-Aldrich Co. Calcium chloride anhydrous ( $\text{CaCl}_2$ , AR, 99%) and sodium phosphate dibasic dodecahydrate ( $\text{Na}_2\text{HPO}_4\cdot 12\text{H}_2\text{O}$ , AR, 99%) were purchased from Aladdin Chemical Co. Kanamycin sulfate (KS) with USP grade was provided from BBI Life Sciences. Dulbecco's Modified Eagle Medium (DMEM), fetal bovine serum (FBS), trypsin-EDTA, and phosphate buffer solution (PBS, pH 7.4) were purchased from Ge Healthcare Life

Science (USA). MTT and antibiotics ( $100 \text{ U}\cdot\text{mL}^{-1}$  streptomycin and  $100 \text{ }\mu\text{g}\cdot\text{mL}^{-1}$  penicillin) were purchased from Solarbio (Beijing, China). NHDF (normal human dermal fibroblast) cell was got from Suzhou Medical Apparatus Research Institute of Southeast University, China.

### **Characterization**

The porous lyophilized ACP/PAA/CS hydrogel was observed by scanning electron microscopy (SEM) (S-4800, Hitachi, Japan) at a voltage of 10 kV. X-ray diffraction (XRD) data were recorded on Rigaku diffractometer (Japan). FT-IR was performed on a Nicolet 6700 spectrometer with a diamond ATR crystal as the window material. Thermal gravimetric analysis (TG) was carried out on a Netzsch STA449F3 analyzer (Germany) by heating from 0 to  $1000 \text{ }^\circ\text{C}$  with the heating rate of  $10 \text{ K/min}$  under air flow. UV spectra were measured on the Jena Specord 50 Plus (Germany).

Rheological properties of the hydrogel were determined using a rotating rheometer (MCR302, Anton Paar) with a frequency sweep mode of  $0.1\sim 10 \text{ Hz}$  at  $25 \text{ }^\circ\text{C}$  in the oscillation mode with a fixed oscillatory strain of 1%. The modulus of the hydrogel was also measured at a time sweep mode by recording storage modulus ( $G'$ ) and loss modulus ( $G''$ ) with increasing temperature. In this mode, the frequency and stress were constant at  $1 \text{ Hz}$  and  $100 \text{ Pa}$ , respectively. And the curves of shear rate-shear stress and shear rate-viscosity were also assessed.

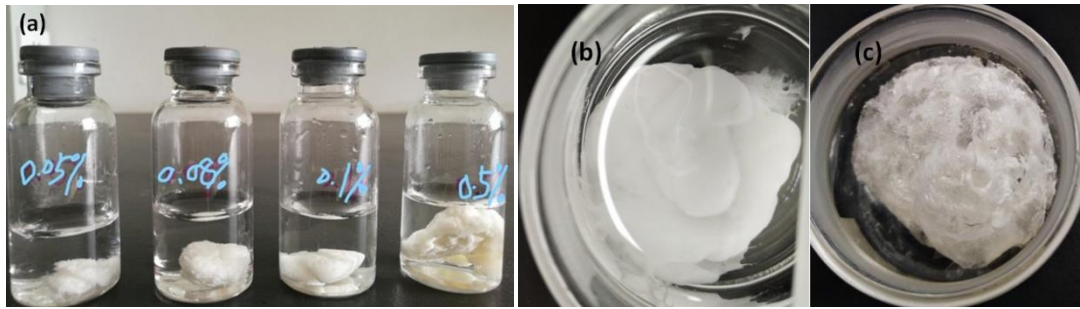

**Figure S1.** a) The photos of complex with different amount chitosan; b) ACP/PAA/CS hydrogel; c) the frozen-dried hydrogel.

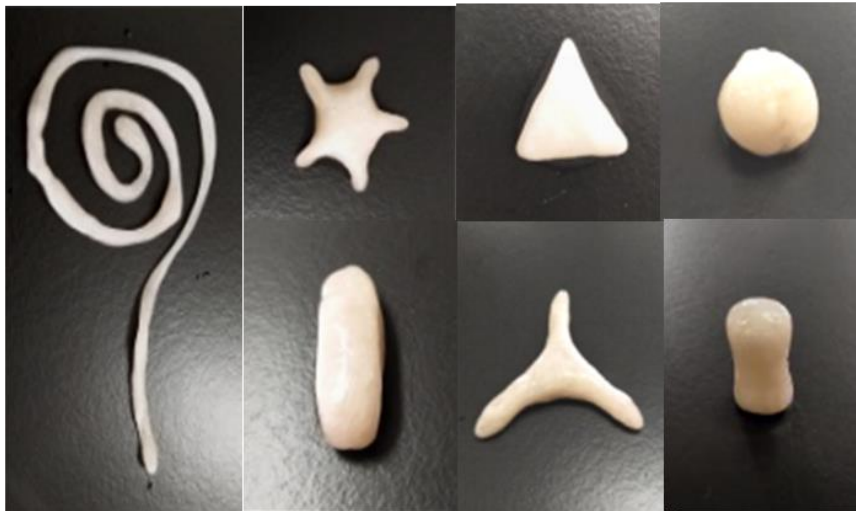

**Figure S2.** The ACP/PAA/CS hydrogel manipulated into various shapes.

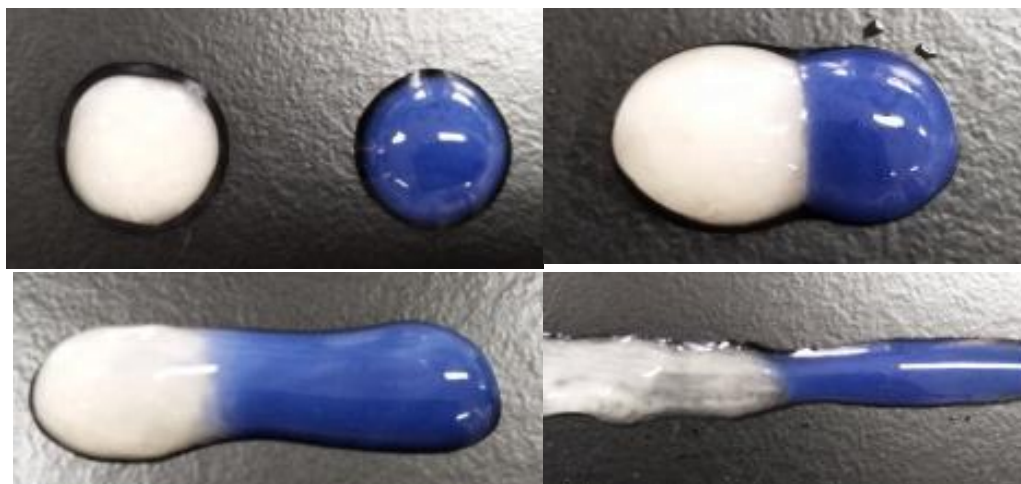

**Figure S3.** The self-healing performance of ACP/PAA/CS hydrogel.

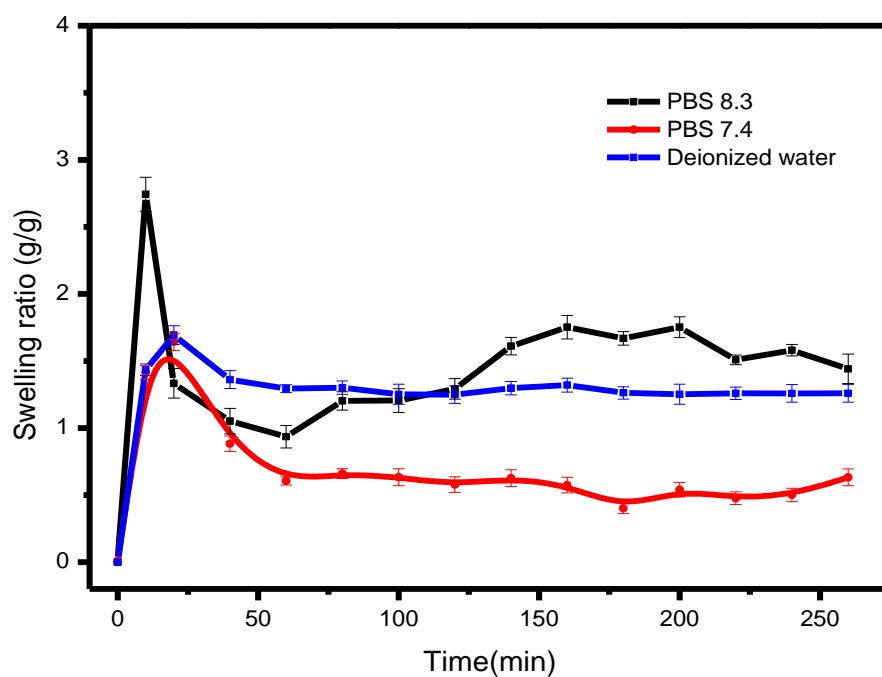

**Figure S4.** The swelling kinetic of the dried hydrogel sample in deionized water and PBS (pH=7.4 and 8.3) at 25°C.

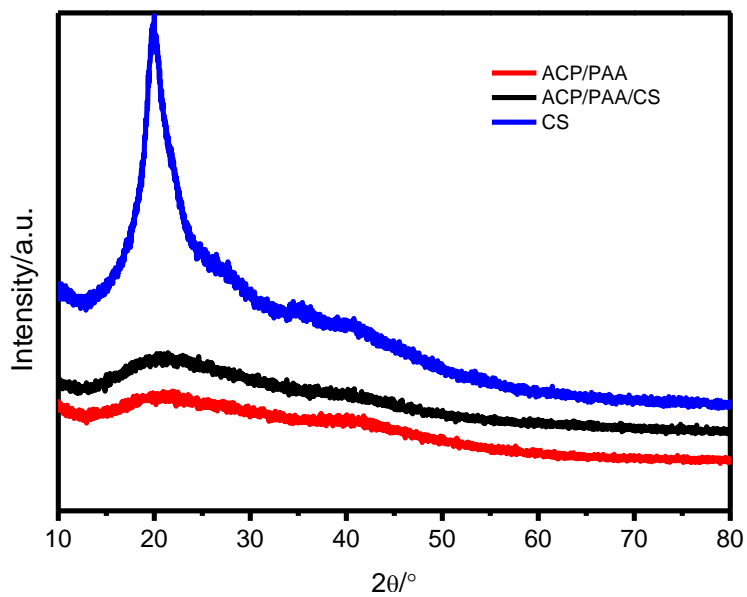

**Figure S5.** XRD profile of the dried ACP/PAA/CS hydrogel.

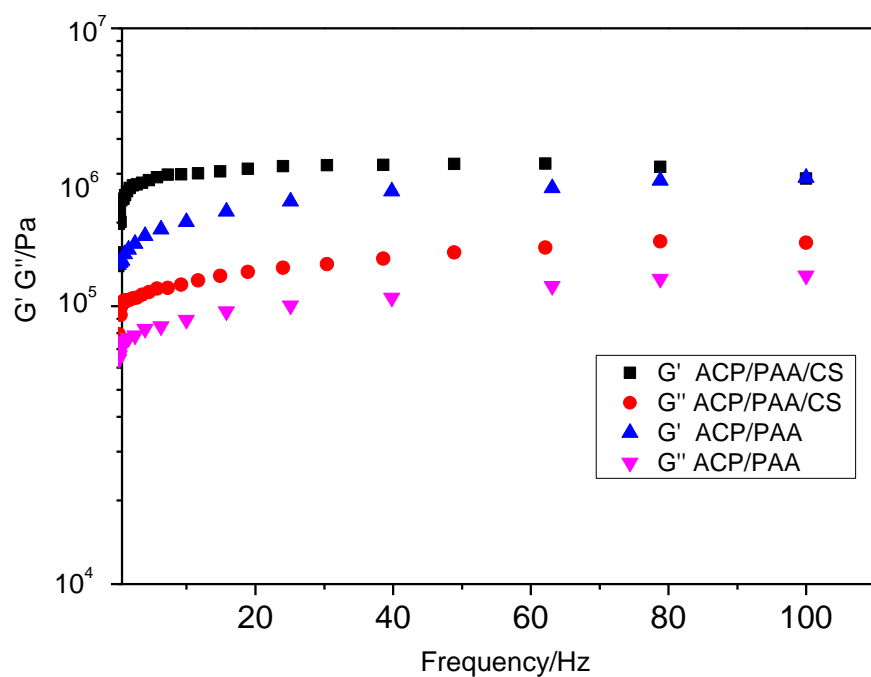

**Figure S6** Frequency dependence of storage ( $G'$ ) and loss ( $G''$ ) moduli of ACP/PAA/CS hydrogel compared with ACP/PAA/hydrogel.

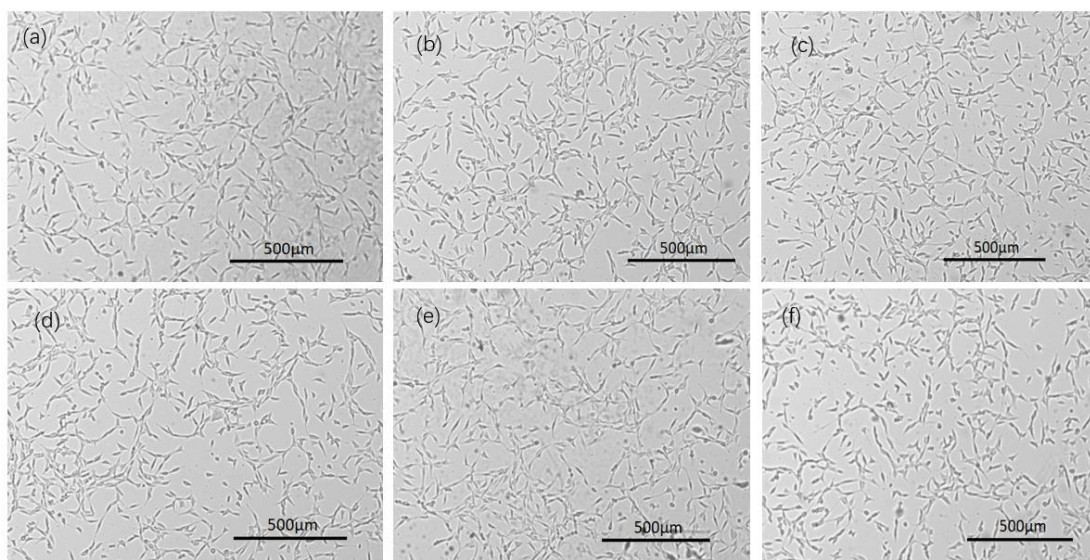

**Figure S7.** Microscopy images of NHDF cell after 24 h incubation with 0 wt% (a), 20 wt% (b), 40 wt% (c), 60 wt% (d), 80 wt% (e) and 100 wt% (f) of hydrogel extracts.

(a)

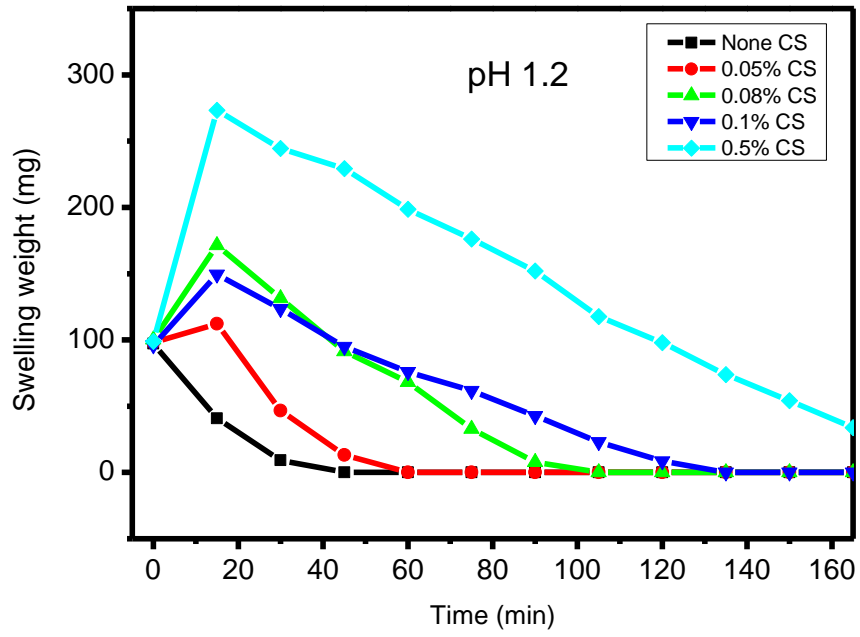

(b)

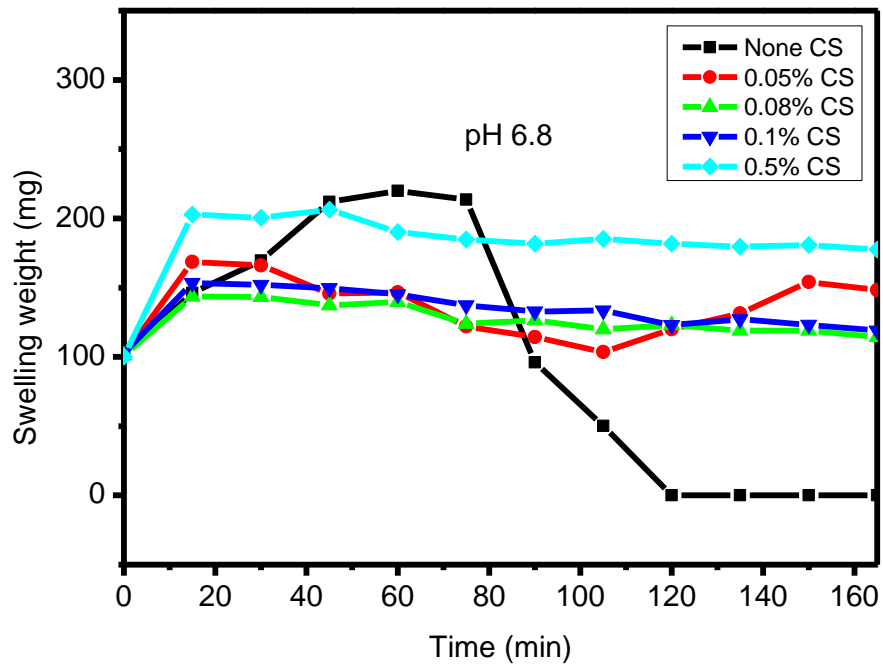

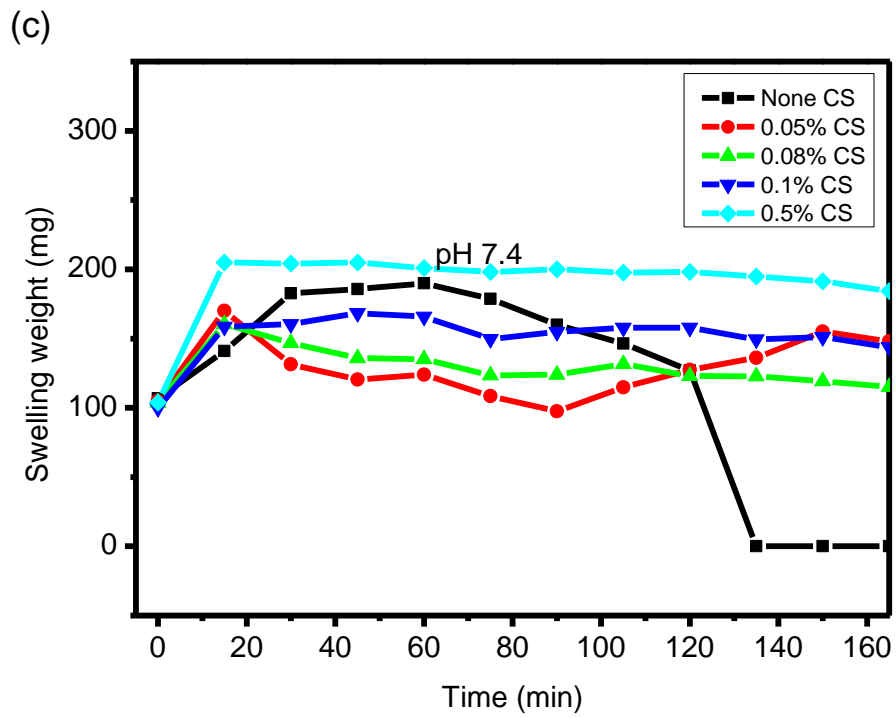

**Figure S8.** The swelling behavior of the hydrogels with different amount of CS at pH 1.2 (a), pH 6.8 (b) and pH 7.4 (c).



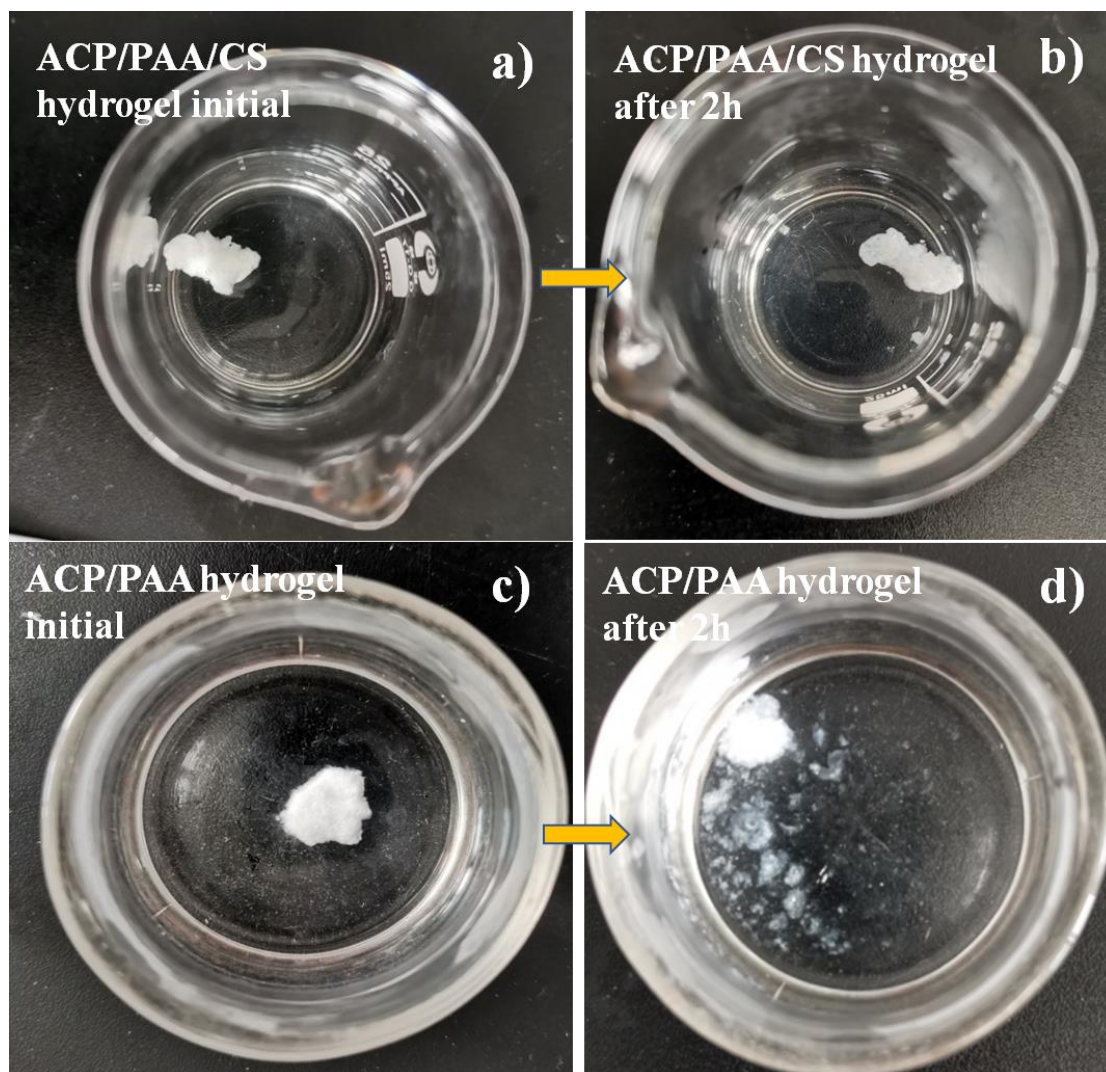

**Figure S9** Photos of different hydrogels immersed in solution with pH=7.4. a) The original ACP/PAA/CS hydrogel; b) ACP/PAA/CS hydrogel after 2 h; c) The original ACP/PAA hydrogel; b) ACP/PAA hydrogel after 2 h;

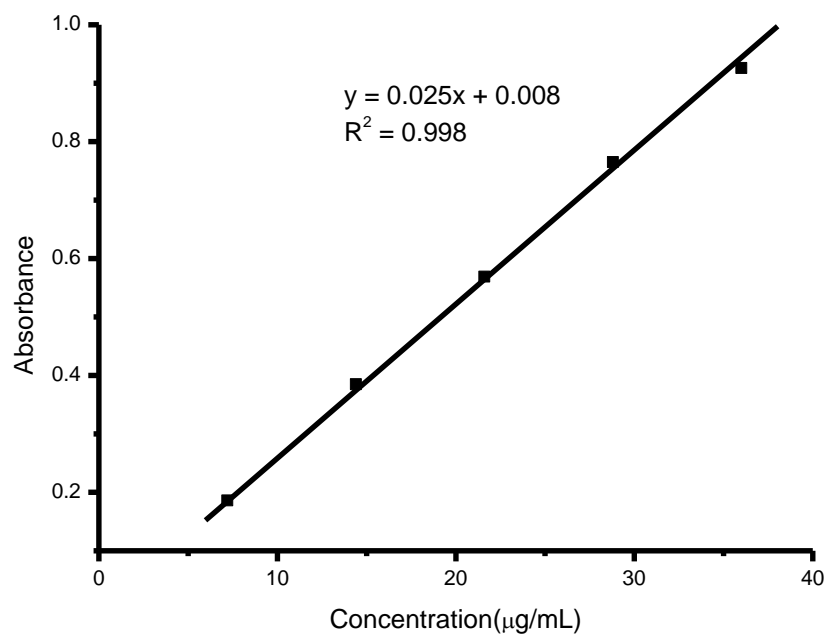

**Figure S10.** The standard curve of kanamycin sulfate.

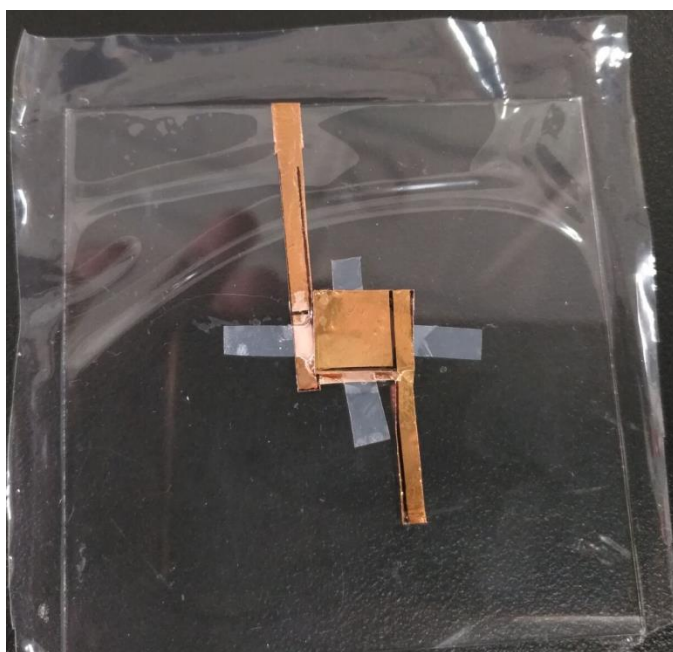

**Figure S11.** The dielectric layer of capacitive-pressure sensor.
